# Supplementary material
Source: PubMed Central journal article supplement (PMC8196436)
Supplement: 12879_2021_6159_MOESM1_ESM.pdf [file 12879_2021_6159_MOESM1_ESM.pdf]

| Hospital    | Group                   | Date |      |      |      | Monthly Average (Based on 2018/19) | Standard dev | Hospital    | Group       | April      | May  | June |
|-------------|-------------------------|------|------|------|------|------------------------------------|--------------|-------------|-------------|------------|------|------|
|             |                         | 2017 | 2018 | 2019 | 2020 |                                    |              |             |             |            |      |      |
| Hospital 1  | CONS                    | 99   | 113  | 102  | 59   | 8.958333333                        | 3.495079357  | Hospital 1  | CONS        | 5          | 11   | 8    |
|             | CSS                     | 54   | 94   | 72   | 17   | 6.916666667                        | 4.009951389  |             | CSS         | 5          | 7    | 6    |
|             | GNR-E                   | 163  | 217  | 207  | 61   | 17.666666667                       | 5.798550544  |             | GNR-E       | 13         | 26   | 20   |
|             | GNR-NE                  | 37   | 64   | 41   | 10   | 4.375                              | 2.128296095  |             | GNR-NE      | 5          | 2    | 5    |
|             | NSS                     | 8    | 13   | 17   | 10   | 1.25                               | 1.360147051  |             | NSS         |            | 1    | 1    |
|             | Other                   | 11   | 11   | 15   | 4    | 1.083333333                        | 1.290994449  |             | Other       | 1          | 2    |      |
|             | Other (GPR)             | 17   | 19   | 18   | 6    | 1.541666667                        | 1.286239389  |             | Other (GPR) | 2          | 2    | 3    |
|             | SA                      | 33   | 63   | 57   | 11   | 5                                  | 2.827728316  |             | SA          | 5          | 7    | 4    |
|             | Yeasts                  | 9    | 16   | 10   | 4    | 1.083333333                        | 0.864437822  |             | Yeasts      | 1          |      | 1    |
|             | Hospital 2              | CONS | 182  | 217  | 202  | 121                                | 17.458333333 |             | 3.934011855 | Hospital 2 | CONS | 17   |
| CSS         |                         | 63   | 80   | 82   | 23   | 6.75                               | 3.273742706  | CSS         | 7           |            | 5    | 13   |
| GNR-E       |                         | 192  | 238  | 259  | 70   | 20.708333333                       | 5.287221401  | GNR-E       | 25          |            | 19   | 16   |
| GNR-NE      |                         | 52   | 57   | 47   | 23   | 4.333333333                        | 2.31566812   | GNR-NE      | 6           |            | 7    | 8    |
| NSS         |                         | 38   | 18   | 34   | 10   | 2.166666667                        | 1.788854382  | NSS         | 2           |            | 10   | 4    |
| Other       |                         | 13   | 17   | 19   | 4    | 1.5                                | 1.151657844  | Other       |             |            |      |      |
| Other (GPR) |                         | 43   | 32   | 42   | 7    | 3.083333333                        | 1.639635873  | Other (GPR) | 2           |            | 5    | 3    |
| SA          |                         | 64   | 62   | 84   | 16   | 6.083333333                        | 3.717370116  | SA          | 8           |            | 1    | 3    |
| Yeasts      |                         | 10   | 20   | 11   | 2    | 1.291666667                        | 1.311403912  | Yeasts      | 5           |            |      |      |
| Hospital 3  |                         | CONS | 129  | 173  | 189  | 62                                 | 15.083333333 | 5.380453082 | Hospital 3  |            | CONS | 18   |
|             | CSS                     | 63   | 105  | 84   | 19   | 7.875                              | 4.316928256  | CSS         |             | 8          | 4    | 8    |
|             | GNR-E                   | 211  | 203  | 190  | 45   | 16.375                             | 3.6690539    | GNR-E       |             | 24         | 21   | 27   |
|             | GNR-NE                  | 51   | 89   | 120  | 24   | 8.708333333                        | 5.120115205  | GNR-NE      |             | 5          | 7    | 1    |
|             | NSS                     | 27   | 34   | 28   | 13   | 2.583333333                        | 2.500216441  | NSS         |             | 2          | 2    | 3    |
|             | Other                   | 7    | 15   | 6    | 3    | 0.875                              | 0.960768923  | Other       |             |            | 1    | 1    |
|             | Other (GPR)             | 14   | 43   | 19   | 5    | 2.583333333                        | 2.322485607  | Other (GPR) |             | 1          | 2    |      |
|             | SA                      | 43   | 92   | 75   | 33   | 6.958333333                        | 3.95678234   | SA          |             | 8          | 7    | 6    |
|             | Yeasts                  | 41   | 46   | 40   | 15   | 3.583333333                        | 6.09785401   | Yeasts      |             | 4          | 13   | 2    |
|             | Hospital 4              | CONS | 142  | 163  | 170  | 122                                | 13.875       | 4.875069676 |             | Hospital 4 | CONS | 6    |
| CSS         |                         | 57   | 96   | 64   | 24   | 6.666666667                        | 3.509445189  | CSS         | 6           |            | 7    | 6    |
| GNR-E       |                         | 156  | 179  | 213  | 46   | 16.333333333                       | 4.966554809  | GNR-E       | 23          |            | 15   | 19   |
| GNR-NE      |                         | 35   | 52   | 53   | 13   | 4.375                              | 2.873485165  | GNR-NE      | 2           |            | 5    | 4    |
| NSS         |                         | 11   | 23   | 16   | 8    | 1.625                              | 1.394538218  | NSS         | 3           |            | 1    |      |
| Other       |                         | 9    | 13   | 11   | 5    | 1                                  | 0.730296743  | Other       | 2           |            | 2    |      |
| Other (GPR) |                         | 20   | 21   | 48   | 11   | 2.875                              | 1.707127914  | Other (GPR) | 3           |            | 2    | 1    |
| SA          |                         | 76   | 63   | 59   | 17   | 5.083333333                        | 2.704117779  | SA          | 9           |            | 9    | 7    |
| Yeasts      |                         | 6    | 9    | 7    |      | 0.666666667                        | 1.069044968  | Yeasts      | 4           |            |      |      |
| Hospital 5  |                         | CONS | 143  | 202  | 192  | 119                                | 16.416666667 | 3.90001858  | Hospital 5  |            | CONS | 16   |
|             | CSS                     | 41   | 96   | 94   | 34   | 7.916666667                        | 3.562078859  | CSS         |             | 5          | 2    | 5    |
|             | GNR-E                   | 236  | 353  | 320  | 89   | 28.041666667                       | 6.265704906  | GNR-E       |             | 21         | 22   | 18   |
|             | GNR-NE                  | 51   | 48   | 39   | 11   | 3.625                              | 2.081230823  | GNR-NE      |             | 3          | 6    | 4    |
|             | NSS                     | 21   | 27   | 35   | 12   | 2.583333333                        | 1.465475707  | NSS         |             | 1          |      | 1    |
|             | Other                   | 15   | 24   | 24   | 10   | 2                                  | 1.124643114  | Other       |             | 1          | 1    | 1    |
|             | Other (GPR)             | 28   | 46   | 34   | 6    | 3.333333333                        | 1.830786349  | Other (GPR) |             | 1          |      | 3    |
|             | SA                      | 38   | 47   | 66   | 21   | 4.708333333                        | 2.136212957  | SA          |             |            | 4    | 4    |
|             | Yeasts                  | 3    | 7    | 13   | 6    | 0.833333333                        | 1.250454463  | Yeasts      |             |            | 1    | 1    |
|             | <b>Across all sites</b> | CONS | 695  | 868  | 855  | 483                                | 71.79166667  | 11.09633377 |             | <b>All</b> | CONS | 62   |
| CSS         |                         | 278  | 471  | 396  | 117  | 36.125                             | 8.714368445  | CSS         | 31          |            | 25   | 38   |
| GNR-E       |                         | 958  | 1190 | ###  | 311  | 99.125                             | 11.96484888  | GNR-E       | 106         |            | 103  | 100  |
| GNR-NE      |                         | 226  | 310  | 300  | 81   | 25.41666667                        | 5.149222539  | GNR-NE      | 21          |            | 27   | 22   |
| NSS         |                         | 105  | 115  | 130  | 53   | 10.208333333                       | 4.149166146  | NSS         | 8           |            | 14   | 9    |
| Other       |                         | 55   | 80   | 75   | 26   | 6.458333333                        | 2.603996371  | Other       | 4           |            | 6    | 2    |
| Other (GPR) |                         | 122  | 161  | 161  | 35   | 13.41666667                        | 4.252024241  | Other (GPR) | 9           |            | 11   | 10   |
| SA          |                         | 254  | 327  | 341  | 98   | 27.833333333                       | 8.154308899  | SA          | 30          |            | 28   | 24   |
| Yeasts      |                         | 69   | 98   | 81   | 27   | 7.458333333                        | 5.912250853  | Yeasts      | 14          |            | 14   | 4    |

|                                                                     | Group        | Number of blood cultures | % of total blood cultures |
|---------------------------------------------------------------------|--------------|--------------------------|---------------------------|
| Blood cultures with no growth (N: % of all blood cultures)          |              | 109,144                  | 91.27%                    |
| Blood cultures with isolate identified (N: % of all blood cultures) | CoNS all     | 2,855                    | 2.39%                     |
|                                                                     | - CLABSI     | 2466                     | 2.06%                     |
|                                                                     | - Non-CLABSI | 341                      | 0.29%                     |
|                                                                     | - Unknown    | 48                       | 0.04%                     |
|                                                                     | S.pneumo     | 78                       | 0.07%                     |
|                                                                     | GNR-E        | 3,508                    | 2.93%                     |
|                                                                     | GNR-NE       | 790                      | 0.66%                     |
|                                                                     | Other        | 1975                     | 1.65%                     |
|                                                                     | S.aureus     | 988                      | 0.83%                     |
|                                                                     | Yeasts       | 246                      | 0.21%                     |

| 2017 |        |           |         |          |          |         |          |       |       |     |      | 2018 |        |           |         |          |          |         |          |       |       |     |      | 2019 |        |  |  |  |
|------|--------|-----------|---------|----------|----------|---------|----------|-------|-------|-----|------|------|--------|-----------|---------|----------|----------|---------|----------|-------|-------|-----|------|------|--------|--|--|--|
| July | August | September | October | November | December | January | February | March | April | May | June | July | August | September | October | November | December | January | February | March | April | May | June | July | August |  |  |  |
| 11   | 8      | 11        | 16      | 13       | 16       | 7       | 9        | 8     | 9     | 13  | 12   | 6    | 7      | 9         | 5       | 8        | 20       | 11      | 6        | 4     | 8     | 8   | 9    | 12   | 14     |  |  |  |
| 6    | 4      | 8         | 2       | 8        | 8        | 11      | 5        | 3     | 9     | 4   | 4    | 4    | 7      | 9         | 17      | 10       | 11       | 7       | 10       | 3     | 6     | 3   | 3    | 1    | 2      |  |  |  |
| 24   | 19     | 13        | 21      | 17       | 10       | 15      | 10       | 15    | 13    | 12  | 19   | 26   | 22     | 15        | 36      | 15       | 19       | 26      | 15       | 13    | 18    | 14  | 18   | 21   | 14     |  |  |  |
| 6    | 2      | 4         | 6       | 7        |          | 6       | 9        | 3     | 9     | 3   | 5    | 5    | 5      | 7         | 6       | 4        | 2        | 4       |          | 6     | 4     | 7   | 4    | 2    | 4      |  |  |  |
| 1    | 1      |           | 1       |          | 3        | 1       |          | 1     |       |     | 3    | 2    |        | 1         | 2       | 3        |          |         | 1        | 1     | 2     | 6   | 1    |      |        |  |  |  |
| 1    | 1      | 2         | 1       | 2        | 1        |         |          |       |       |     | 1    |      | 1      | 3         | 5       | 1        |          |         | 1        | 2     |       | 2   | 1    | 4    | 2      |  |  |  |
| 3    | 4      |           | 1       |          | 2        |         | 2        | 4     | 1     |     |      | 1    | 2      | 1         | 3       | 2        | 3        |         | 5        |       |       | 1   | 1    |      | 3      |  |  |  |
| 1    | 2      | 3         | 1       | 8        | 2        | 7       | 6        | 2     | 1     | 4   | 4    | 7    | 10     | 2         | 5       | 5        | 10       | 10      | 7        | 2     | 3     | 4   | 6    | 9    | 1      |  |  |  |
| 1    | 1      |           | 4       |          | 1        |         | 3        | 1     |       | 2   | 3    | 2    | 2      | 2         | 1       |          |          |         | 1        |       | 3     |     | 3    |      | 1      |  |  |  |
| 24   | 20     | 17        | 21      | 18       | 27       | 26      | 17       | 24    | 10    | 16  | 19   | 22   | 15     | 20        | 19      | 16       | 13       | 16      | 13       | 20    | 18    | 21  | 17   | 13   | 18     |  |  |  |
| 7    | 9      | 6         | 6       | 6        | 4        | 5       | 9        | 11    | 8     | 6   | 8    | 1    | 3      | 3         | 7       | 12       | 7        | 8       | 4        | 6     | 9     | 5   | 4    | 15   | 4      |  |  |  |
| 20   | 29     | 23        | 19      | 18       | 23       | 20      | 8        | 26    | 15    | 18  | 19   | 20   | 25     | 19        | 21      | 23       | 24       | 12      | 19       | 17    | 21    | 24  | 12   | 21   | 27     |  |  |  |
| 3    | 4      | 4         | 8       | 7        | 5        | 3       | 5        | 3     | 6     | 5   | 2    | 6    | 1      | 2         | 7       | 7        | 10       | 3       | 1        | 2     | 3     | 4   | 2    | 6    | 5      |  |  |  |
| 3    | 5      | 4         |         | 6        | 4        | 2       | 1        |       |       | 1   | 1    | 3    | 3      | 4         | 2       |          | 1        | 3       | 2        | 8     | 2     | 4   | 1    | 4    | 1      |  |  |  |
| 3    | 5      | 1         | 2       | 1        | 1        |         | 1        | 2     | 1     | 1   | 2    | 1    |        | 6         | 2       | 1        | 3        | 1       | 2        |       | 1     | 1   | 1    | 2    | 2      |  |  |  |
| 5    | 6      | 4         | 6       | 5        | 7        | 7       | 1        | 5     | 3     | 3   | 1    | 3    | 1      | 2         | 3       | 1        | 2        | 3       | 5        | 4     | 2     | 3   | 4    | 6    | 2      |  |  |  |
| 11   | 11     | 7         | 5       | 6        | 12       | 10      | 5        | 7     | 2     | 2   | 4    | 3    | 3      | 5         | 7       | 7        | 7        | 12      | 4        | 5     | 7     | 13  | 16   | 2    | 9      |  |  |  |
| 1    | 2      | 1         |         | 1        |          | 2       | 1        | 4     |       |     |      | 4    | 4      | 2         | 2       | 1        | 1        |         | 1        | 1     | 1     | 3   | 4    |      |        |  |  |  |
| 6    | 25     | 13        | 9       | 12       | 8        | 9       | 26       | 25    | 7     | 9   | 7    | 11   | 14     | 21        | 20      | 14       | 10       | 19      | 19       | 18    | 12    | 11  | 12   | 15   | 16     |  |  |  |
| 2    | 7      | 6         | 6       | 5        | 17       | 12      | 15       | 6     | 11    | 10  | 8    | 1    | 10     | 10        | 5       | 9        | 8        | 6       | 1        | 4     | 13    | 10  | 7    | 4    | 13     |  |  |  |
| 12   | 20     | 28        | 28      | 29       | 22       | 14      | 13       | 18    | 14    | 25  | 13   | 18   | 12     | 19        | 20      | 21       | 16       | 16      | 11       | 12    | 13    | 15  | 17   | 21   | 19     |  |  |  |
| 7    | 1      | 3         | 5       | 10       | 12       | 9       | 3        | 9     | 2     | 18  | 4    | 3    | 14     | 5         | 12      | 7        | 3        | 7       | 18       | 5     | 17    | 7   | 7    | 10   | 5      |  |  |  |
| 3    | 4      | 6         | 1       | 1        | 5        | 4       | 2        | 1     | 3     | 2   | 9    | 1    | 6      | 2         | 3       | 1        |          | 3       | 10       | 1     | 2     | 3   | 1    | 1    | 3      |  |  |  |
|      |        | 1         | 3       | 1        |          | 2       | 2        |       |       | 1   | 1    | 1    | 1      | 1         | 3       | 4        |          |         | 1        |       |       |     | 1    |      |        |  |  |  |
| 4    | 1      |           | 1       | 1        | 4        | 4       | 4        | 1     | 1     | 2   | 4    | 1    | 10     | 6         | 7       | 1        | 2        | 2       | 3        | 3     | 1     | 2   |      | 3    |        |  |  |  |
| 1    | 2      | 9         | 2       | 4        | 4        | 16      | 6        | 4     | 3     | 13  | 10   | 6    | 5      | 3         | 1       | 14       | 11       | 3       | 4        |       | 6     | 10  | 11   | 6    | 7      |  |  |  |
| 5    | 3      |           | 11      | 3        |          | 2       | 23       |       | 1     | 4   |      | 11   | 1      | 1         | 1       | 1        | 1        |         |          | 2     |       | 2   |      |      | 12     |  |  |  |
| 18   | 14     | 18        | 18      | 15       | 19       | 20      | 14       | 24    | 10    | 11  | 7    | 4    | 13     | 13        | 19      | 16       | 12       | 12      | 17       | 10    | 14    | 9   | 7    | 14   | 20     |  |  |  |
| 4    | 5      | 4         | 12      | 6        | 7        | 16      | 9        | 14    | 7     | 12  | 2    | 9    | 6      | 4         | 8       | 9        |          | 7       | 4        | 3     | 7     | 9   | 6    | 3    | 6      |  |  |  |
| 17   | 17     | 19        | 19      | 19       | 8        | 12      | 24       | 10    | 14    | 17  | 13   | 14   | 12     | 22        | 10      | 19       | 12       | 13      | 16       | 15    | 15    | 20  | 17   | 19   | 19     |  |  |  |
| 3    | 3      | 2         | 5       | 6        | 5        | 9       | 3        | 4     | 3     | 3   | 3    | 3    | 4      | 13        | 3       | 1        | 3        |         | 1        | 3     | 5     | 3   | 4    | 4    | 9      |  |  |  |
|      | 1      | 1         | 2       | 1        | 2        |         | 2        | 2     | 1     | 4   | 1    |      | 2      | 4         | 3       | 1        | 3        |         | 1        | 1     |       | 1   | 1    | 2    | 1      |  |  |  |
| 1    | 1      | 2         | 1       |          |          | 2       |          | 2     |       | 1   | 1    | 3    | 1      | 1         |         | 2        |          |         | 1        |       | 1     | 2   |      | 1    |        |  |  |  |
| 2    | 1      | 2         | 3       | 1        | 5        | 2       | 3        | 3     | 1     | 2   |      | 2    |        |           | 6       | 1        | 1        | 3       | 5        | 2     | 3     | 7   | 4    | 5    | 5      |  |  |  |
| 7    | 11     | 3         | 17      |          | 13       | 5       | 4        | 5     | 5     | 8   | 12   | 4    | 2      | 2         | 5       | 8        | 3        | 3       | 6        | 8     |       | 4   | 6    | 2    | 6      |  |  |  |
|      | 1      |           | 1       |          |          | 2       |          |       | 3     | 2   |      |      | 1      |           | 1       |          |          | 2       |          |       | 1     |     |      |      |        |  |  |  |
| 10   | 14     | 16        | 14      | 22       | 22       | 17      | 16       | 24    | 13    | 14  | 15   | 17   | 17     | 20        | 14      | 15       | 20       | 12      | 23       | 15    | 18    | 11  | 17   | 11   | 9      |  |  |  |
| 3    | 7      | 4         | 4       | 6        | 5        | 8       | 8        | 3     | 5     | 7   | 6    | 14   | 9      | 8         | 5       | 11       | 12       | 13      | 6        | 3     | 5     | 7   | 5    | 7    | 4      |  |  |  |
| 25   | 38     | 26        | 25      | 31       | 30       | 20      | 28       | 33    | 34    | 36  | 21   | 26   | 27     | 37        | 29      | 39       | 23       | 24      | 25       | 28    | 24    | 27  | 20   | 31   | 24     |  |  |  |
| 7    | 4      | 8         | 2       | 9        | 8        | 2       | 6        | 5     | 3     | 1   | 3    | 10   | 1      | 6         | 3       | 5        | 3        | 3       | 3        | 4     | 1     | 4   | 3    | 1    | 2      |  |  |  |
| 10   | 1      | 2         |         | 2        | 4        | 2       | 1        |       | 1     | 2   | 2    | 5    | 4      | 2         | 3       | 2        | 3        | 1       | 3        | 5     |       | 2   | 3    | 2    | 4      |  |  |  |
| 1    | 1      | 1         | 6       | 1        | 2        | 5       | 2        |       | 1     | 2   | 1    | 2    | 3      | 2         | 1       | 3        | 1        | 2       | 2        | 2     |       | 1   | 3    | 2    | 2      |  |  |  |
| 1    | 6      | 3         | 6       | 5        | 3        | 4       | 4        | 4     | 2     | 3   | 3    | 2    | 6      | 5         | 3       | 3        | 7        | 5       | 5        | 1     | 1     | 1   |      | 7    | 3      |  |  |  |
| 8    | 4      | 7         | 3       | 3        | 5        | 3       | 4        | 2     | 3     | 2   | 8    | 1    | 6      | 4         | 8       | 4        | 2        | 5       | 7        | 7     | 6     | 6   | 4    | 3    | 6      |  |  |  |
| 1    |        |           |         |          | 2        |         |          | 1     |       | 1   |      | 1    | 1      | 1         |         |          | 2        |         | 2        |       | 3     |     |      | 1    |        |  |  |  |
| 69   | 81     | 75        | 78      | 80       | 92       | 79      | 82       | 105   | 49    | 63  | 60   | 60   | 66     | 83        | 77      | 69       | 75       | 70      | 78       | 67    | 70    | 60  | 62   | 65   | 77     |  |  |  |
| 22   | 32     | 28        | 30      | 31       | 41       | 52      | 46       | 37    | 40    | 39  | 28   | 29   | 35     | 34        | 42      | 51       | 38       | 41      | 25       | 19    | 40    | 34  | 25   | 30   | 29     |  |  |  |
| 98   | 123    | 109       | 112     | 114      | 93       | 81      | 83       | 102   | 90    | 108 | 85   | 104  | 98     | 112       | 116     | 117      | 94       | 91      | 86       | 85    | 91    | 100 | 84   | 113  | 103    |  |  |  |
| 26   | 14     | 21        | 26      | 39       | 30       | 29      | 26       | 24    | 23    | 30  | 17   | 27   | 25     | 33        | 31      | 24       | 21       | 17      | 23       | 20    | 30    | 25  | 20   | 23   | 25     |  |  |  |
| 17   | 12     | 13        | 4       | 10       | 18       | 9       | 6        | 4     | 5     | 9   | 16   | 11   | 15     | 13        | 13      | 7        | 7        | 7       | 17       | 16    | 6     | 16  | 7    | 9    | 9      |  |  |  |
| 6    | 8      | 7         | 13      | 5        | 4        | 9       | 5        | 4     | 2     | 5   | 5    | 7    | 6      | 7         | 11      | 14       | 5        | 4       | 6        | 6     | 3     | 6   | 6    | 9    | 6      |  |  |  |
| 15   | 18     | 9         | 17      | 12       | 21       | 17      | 14       | 17    | 8     | 10  | 8    | 9    | 19     | 14        | 22      | 8        | 15       | 18      | 18       | 10    | 7     | 14  | 9    | 18   | 16     |  |  |  |
| 28   | 30     | 29        | 28      | 21       | 36       | 41      | 25       | 20    | 14    | 29  | 38   | 21   | 26     | 16        | 26      | 38       | 33       | 33      | 28       | 22    | 22    | 37  | 43   | 22   | 29     |  |  |  |
| 8    | 7      | 1         | 16      | 4        | 1        | 8       | 27       | 6     | 4     | 9   | 3    | 14   | 9      | 8         | 4       | 4        | 2        | 2       | 5        | 3     | 8     | 5   | 7    | 1    | 13     |  |  |  |

2020

| September | October | November | December | January | February | March | April |
|-----------|---------|----------|----------|---------|----------|-------|-------|
| 6         | 6       | 7        |          |         |          |       |       |
| 8         | 6       | 14       | 9        | 8       | 14       | 24    | 13    |
| 6         | 6       | 14       | 9        | 9       | 3        | 1     | 4     |
| 22        | 16      | 19       | 11       | 31      | 10       | 8     | 12    |
| 2         | 3       | 4        | 1        | 4       | 4        | 1     | 1     |
| 1         | 3       | 1        | 1        | 5       | 1        | 2     | 2     |
| 2         |         |          | 1        |         |          | 2     | 2     |
| 1         | 2       | 4        | 1        | 2       | 3        | 1     |       |
| 6         | 6       | 3        | 2        | 2       | 2        | 4     | 3     |
| 1         | 1       |          |          | 1       | 1        | 1     |       |
| 18        | 10      | 19       | 19       | 18      | 22       | 31    | 50    |
| 3         | 8       | 6        | 10       | 4       | 10       | 3     | 6     |
| 29        | 23      | 27       | 27       | 28      | 12       | 14    | 16    |
| 4         | 3       | 7        | 7        | 4       | 10       | 4     | 5     |
|           | 1       | 3        | 5        | 2       | 3        | 4     |       |
| 2         | 2       | 2        | 1        | 1       |          |       | 1     |
| 4         | 1       | 4        | 4        | 1       | 1        | 1     | 1     |
| 3         | 2       | 5        | 6        | 4       | 6        | 3     | 3     |
| 1         |         |          |          |         |          |       | 2     |
| 18        | 21      | 11       | 17       | 12      | 19       | 15    | 16    |
| 6         | 2       | 2        | 16       | 8       | 3        | 6     |       |
| 16        | 22      | 15       | 13       | 20      | 7        | 9     | 9     |
| 7         | 6       | 15       | 16       | 3       | 8        | 5     | 8     |
| 1         | 1       | 2        | 1        | 8       |          | 4     | 1     |
| 1         | 1       | 1        | 2        | 1       |          |       | 2     |
| 1         | 1       | 2        | 1        |         |          |       | 2     |
| 4         | 6       | 8        | 10       | 11      | 2        | 14    | 6     |
| 8         | 4       | 11       | 3        | 5       |          |       | 7     |
| 16        | 17      | 21       | 13       | 11      | 14       | 37    | 60    |
| 4         | 5       | 5        | 5        | 7       | 5        | 6     | 6     |
| 18        | 12      | 17       | 32       | 16      | 12       | 12    | 6     |
| 4         | 6       | 5        | 9        | 1       | 2        | 4     | 6     |
| 1         | 6       | 1        | 1        | 1       | 1        | 2     | 4     |
| 1         | 1       | 1        | 3        | 1       | 1        | 2     | 2     |
| 2         | 3       | 5        | 4        | 6       | 1        | 4     |       |
| 2         | 6       | 11       | 5        | 2       | 1        | 9     | 5     |
| 4         |         |          |          |         |          |       |       |
| 17        | 20      | 23       | 16       | 26      | 23       | 36    | 34    |
| 11        | 15      | 5        | 13       | 11      | 10       | 5     | 8     |
| 30        | 43      | 22       | 22       | 28      | 21       | 20    | 20    |
| 5         | 6       | 3        | 4        | 2       | 3        | 5     | 1     |
| 5         | 6       | 4        |          | 6       | 2        | 2     | 2     |
| 2         | 1       | 5        | 1        | 3       | 1        | 2     | 4     |
| 2         | 5       | 1        | 3        | 1       | 1        | 1     | 4     |
| 5         | 4       | 4        | 9        | 4       | 7        | 3     | 7     |
|           | 2       |          |          |         |          |       | 5     |
| 75        | 74      | 81       | 76       | 75      | 92       | 143   | 173   |
| 32        | 36      | 32       | 53       | 39      | 31       | 21    | 26    |
| 115       | 116     | 100      | 105      | 123     | 62       | 63    | 63    |
| 22        | 24      | 34       | 37       | 14      | 27       | 19    | 21    |
| 8         | 17      | 11       | 7        | 22      | 7        | 14    | 10    |
| 7         | 5       | 9        | 8        | 7       | 2        | 6     | 11    |
| 10        | 12      | 16       | 13       | 12      | 8        | 8     | 7     |
| 20        | 18      | 34       | 33       | 23      | 18       | 33    | 24    |
| 14        | 2       | 5        | 16       | 3       | 1        | 7     | 16    |

Z. Scores

|            |             | 2017       |            |            |            |            |            |            |            |             |             |             |            | 2018       |            |             |  |  |  |
|------------|-------------|------------|------------|------------|------------|------------|------------|------------|------------|-------------|-------------|-------------|------------|------------|------------|-------------|--|--|--|
| Hospital   | Group       | April      | May        | June       | July       | August     | September  | October    | November   | December    | January     | February    | March      | April      | May        | June        |  |  |  |
| Hospital 1 | CONS        | -1.1325446 | 0.5841546  | -0.274195  | 0.5841546  | -0.274195  | 0.5841546  | 2.01473728 | 1.15638767 | 2.01473728  | -0.5603116  | 0.01192152  | -0.274195  | 0.01192152 | 1.15638767 | 0.87027113  |  |  |  |
|            | CSS         | -0.4779775 | 0.02078163 | -0.2285979 | -0.2285979 | -0.7273571 | 0.27016121 | -1.2261163 | 0.27016121 | 1.01829996  | -0.4779775  | -0.9767367  | 0.5195408  | -0.9767367 | 0.5195408  | -0.7273571  |  |  |  |
|            | GNR-E       | -0.8047988 | 1.43714076 | 0.40239941 | 1.09222698 | 0.22994252 | -0.8047988 | 0.5748563  | -0.1149713 | -1.3221695  | -0.459885   | -1.3221695  | -0.459885  | -0.8047988 | -0.9772567 | 0.22994252  |  |  |  |
|            | GNR-NE      | 0.29366215 | -1.1159162 | 0.29366215 | 0.76352158 | -1.1159162 | -0.1761973 | 0.76352158 | 1.23338102 | -2.055635   | 0.76352158  | 2.17309989  | -0.6460567 | 2.17309989 | -0.6460567 | 0.29366215  |  |  |  |
|            | NSS         | -0.9190183 | -0.1838037 | -0.1838037 | -0.1838037 | -0.1838037 | -0.9190183 | -0.1838037 | -0.9190183 | 1.28662559  | -0.1838037  | -0.9190183  | -0.1838037 | -0.9190183 | -0.9190183 | 1.28662559  |  |  |  |
|            | Other       | -0.0645497 | 0.71004695 | -0.8391464 | -0.0645497 | -0.0645497 | 0.71004695 | -0.0645497 | 0.71004695 | -0.0645497  | 0.71004695  | -0.0645497  | -0.8391464 | -0.8391464 | -0.8391464 | -0.0645497  |  |  |  |
|            | Other (GPR) | 0.35633595 | 0.35633595 | 1.1337962  | 1.1337962  | 1.91125645 | -1.1985846 | -0.4211243 | -1.1985846 | 0.35633595  | -1.1985846  | 0.35633595  | 1.9125645  | -0.4211243 | -1.1985846 | 1.1337962   |  |  |  |
|            | SA          | 0          | 0.70728153 | -0.3536408 | -1.4145631 | -1.0609223 | -0.7072815 | -1.4145631 | 1.0609223  | -1.0609223  | 0.70728153  | 0.35364076  | -1.0609223 | -1.4145631 | -0.3536408 | -0.3536408  |  |  |  |
|            | Yeasts      | -0.0964018 | -1.253223  | -0.0964018 | -0.0964018 | -0.0964018 | -1.253223  | 3.37406184 | -1.253223  | -0.0964018  | -1.253223   | 2.21724064  | -0.0964018 | -1.253223  | 2.21724064 | -0.0964018  |  |  |  |
| Hospital 2 | CONS        | -0.1165053 | -0.3706988 | 1.15446187 | 1.66284874 | 0.64607499 | -0.1165053 | 0.90026843 | 0.13768811 | 2.42542906  | 2.17123562  | -0.1165053  | 1.66284874 | -1.8958594 | -0.3706988 | 0.39188155  |  |  |  |
|            | CSS         | 0.07636519 | -0.5345564 | 1.90912987 | 0.07636519 | 0.68728675 | -0.2290956 | -0.2290956 | -0.2290956 | -0.8400171  | -0.5345564  | 0.68728675  | 1.29820831 | 0.38182597 | -0.2290956 | 0.38182597  |  |  |  |
|            | GNR-E       | 0.8117055  | -0.3231061 | -0.8905119 | -0.1339708 | 1.56824654 | 0.43343497 | -0.3231061 | -0.5122413 | 0.43343497  | -0.1339708  | -2.4035939  | 1.00084076 | -1.0796471 | -0.5122413 | -0.3231061  |  |  |  |
|            | GNR-NE      | 0.71973469 | 1.1515755  | 1.58341631 | -0.5757877 | -0.1439469 | -0.1439469 | 1.58341631 | 1.1515755  | 0.28789387  | -0.5757877  | 0.28789387  | -0.5757877 | 0.71973469 | 0.28789387 | -1.0076286  |  |  |  |
|            | NSS         | -0.0931695 | 4.37896646 | 1.02486449 | 0.4658475  | 1.58388148 | 1.02486449 | -1.2112035 | 2.14289848 | -0.42486449 | -0.0931695  | -0.6521865  | -1.2112035 | -1.2112035 | -0.6521865 | -0.6521865  |  |  |  |
|            | Other       | -1.3024702 | -1.3024702 | -1.3024702 | 1.30247018 | 3.03909709 | -0.4341567 | 0.43415673 | -0.4341567 | -0.4341567  | -1.3024702  | -0.4341567  | 0.43415673 | -0.4341567 | -0.4341567 | 0.43415673  |  |  |  |
|            | Other (GPR) | -0.6607158 | 1.16895873 | -0.0508243 | 1.16895873 | 1.77885024 | 0.55906722 | 1.77885024 | 1.16895873 | 3.28874175  | 2.38874175  | -1.2706073  | 1.6895873  | -0.0508243 | -0.0508243 | -1.2706073  |  |  |  |
|            | SA          | 0.51559748 | -1.3674542 | -0.8294394 | 1.32261962 | 1.32261962 | 0.2465901  | -0.2914247 | -0.0224173 | 1.59162701  | 1.05361224  | -0.2914247  | 0.2465901  | -1.0984468 | -1.0984468 | -0.560432   |  |  |  |
|            | Yeasts      | 2.82775833 | -0.9849495 | -0.9849495 | -0.222408  | 0.54013361 | -0.222408  | -0.9849495 | -0.222408  | -0.9849495  | 0.54013361  | -0.222408   | 2.06521676 | -0.9849495 | -0.9849495 | -0.9849495  |  |  |  |
| Hospital 3 | CONS        | 0.5420857  | -0.3872041 | 1.84309137 | -1.6882097 | -1.6882097 | 1.84309137 | -0.3872041 | -1.1306359 | -0.573062   | -1.1306359  | 2.02894933  | 1.84309137 | -1.1306359 | -1.1306359 | -1.1306359  |  |  |  |
|            | CSS         | 0.02895577 | -0.897629  | 0.02895577 | -1.3609214 | -0.2026904 | -0.4343366 | -0.6658828 | 2.11377152 | 0.95554055  | 1.65047913  | -0.443366   | 0.72389436 | 0.49224816 | 0.02895577 | 0.02895577  |  |  |  |
|            | GNR-E       | 2.07819242 | 1.26054294 | 2.8958419  | -1.1924055 | 0.98799312 | 3.16839172 | 3.4094155  | 1.53309277 | -0.6473058  | -0.44289347 | -0.44289347 | -0.6473058 | 2.35074224 | -0.6473058 | -0.44289347 |  |  |  |
|            | GNR-NE      | -0.7242676 | -0.3336513 | -1.5055    | -0.3336513 | -1.5055    | -1.1148836 | -0.7242676 | -0.2252797 | 0.64288918  | 0.05696486  | -1.1148836  | 0.05696486 | -1.301919  | 1.81473781 | -0.9195757  |  |  |  |
|            | NSS         | -0.2333131 | -0.2333131 | 0.16665224 | 0.16665224 | 0.56661761 | 1.36654836 | -0.6332785 | -0.6332785 | 0.96658298  | 0.56661761  | -0.2333131  | -0.6332785 | 0.16665224 | -0.2333131 | 2.56644447  |  |  |  |
|            | Other       | -0.9107289 | 0.13010412 | 0.13010412 | -0.9107289 | -0.9107289 | 0.13010412 | 2.21177012 | 0.13010412 | -0.9107289  | 1.17093712  | 1.17093712  | -0.9107289 | -0.9107289 | 0.13010412 | -0.9107289  |  |  |  |
|            | Other (GPR) | -0.6817409 | -0.2511677 | -1.112314  | 0.60997866 | -0.6817409 | -1.112314  | -0.6817409 | -0.6817409 | 0.60997866  | 0.60997866  | 0.60997866  | -0.6817409 | -0.6817409 | -0.2511677 | 0.60997866  |  |  |  |
|            | SA          | 0.26326105 | 0.01053044 | -0.2422002 | -1.5058532 | -1.2531226 | -1.5058532 | -0.7476614 | -0.7476614 | 2.2851059   | -0.2422002  | -0.7476614  | 2.2851059  | -1.000392  | 1.52691408 | 0.76872226  |  |  |  |
|            | Yeasts      | 0.06833005 | 1.54425912 | -0.2596542 | 0.23232217 | -0.0956621 | -0.8671684 | 1.21627488 | -0.0956621 | -0.5876384  | -0.2596542  | 3.18418031  | -0.5876384 | -0.4236463 | 0.06833005 | -0.4236463  |  |  |  |
| Hospital 4 | CONS        | -1.6153615 | 1.2563923  | 0.02564066 | 0.84614175 | 0.02564066 | 0.84614175 | 0.2076593  | 1.2563923  | 0.02564066  | 0.02564066  | 1.2563923   | 0.02564066 | 0.02564066 | -1.6153615 | -1.6153615  |  |  |  |
|            | CSS         | -0.1899636 | 0.09498178 | -0.1899636 | -0.7598542 | -0.4749089 | -0.7598542 | 1.5197084  | -0.1899636 | 0.09498178  | 2.6594897   | 0.66847243  | 2.08959905 | 0.09498178 | 1.5197084  | -1.3297449  |  |  |  |
|            | GNR-E       | 1.34231211 | -0.2684624 | 0.53692484 | 0.13423121 | 0.13423121 | 0.53692484 | 0.53692484 | 0.53692484 | -1.6778901  | -0.8725029  | 1.54365893  | -1.2751965 | -0.4698092 | 0.13423121 | -0.6711561  |  |  |  |
|            | GNR-NE      | -0.8265225 | 0.21750591 | -0.1305035 | -0.478513  | -0.478513  | -0.8265225 | 0.21750591 | 0.56551536 | 0.21750591  | 1.60954372  | -0.478513   | -0.1305035 | -0.478513  | -0.478513  | -0.478513   |  |  |  |
|            | NSS         | 0.98598947 | -0.448177  | -1.1652603 | -1.1652603 | -0.448177  | -0.448177  | 0.26890622 | -0.448177  | 0.26890622  | -1.1652603  | 0.26890622  | 0.26890622 | -0.448177  | 1.70307272 | -0.448177   |  |  |  |
|            | Other       | 1.36930639 | 1.36930639 | -1.3693064 | 0          | 0          | 1.36930639 | 0          | -1.3693064 | 1.36930639  | -1.3693064  | 1.36930639  | -1.3693064 | 0          | 0          | 0           |  |  |  |
|            | Other (GPR) | 0.0732224  | -0.5125568 | -1.098336  | -0.5125568 | -1.098336  | -0.5125568 | 0.0732224  | -1.098336  | 1.24478077  | -0.5125568  | 0.0732224   | -1.098336  | -0.5125568 | -1.6841152 | -1.6841152  |  |  |  |
|            | SA          | 1.44840831 | 1.44840831 | 0.70879556 | 0.70879556 | 2.18802107 | -0.77043   | 4.40685933 | -1.8798491 | 2.92763382  | -0.0308172  | -0.0308172  | -0.0308172 | -0.0308172 | 1.07860193 | 2.5578274   |  |  |  |
|            | Yeasts      | 3.11804782 | -0.6236096 | -0.6236096 | -0.6236096 | 0.31180478 | -0.6236096 | 0.31180478 | -0.6236096 | -0.6236096  | 1.24721913  | -0.6236096  | -0.6236096 | 2.18263348 | 1.24721913 | -0.6236096  |  |  |  |
| Hospital 5 | CONS        | -0.1068371 | 0.40598097 | -1.3888823 | -1.6452913 | -0.6196552 | -0.1068371 | -0.6196552 | 1.43161711 | 1.43161711  | 0.14957194  | -0.1068371  | 1.94443518 | -0.8760642 | -0.6196552 | -0.3632461  |  |  |  |
|            | CSS         | -0.8188102 | -1.6610151 | -0.8188102 | -1.3802801 | -0.2573404 | -1.0995452 | -0.5380753 | -0.8188102 | 0.02339458  | 0.02339458  | -1.3802801  | -0.8188102 | -0.2573404 | -0.5380753 | -0.5380753  |  |  |  |
|            | GNR-E       | -1.1238427 | -0.9642437 | -1.6026396 | -0.4854468 | 1.58933966 | -0.3258479 | -0.4854468 | 0.47214693 | 0.31254797  | -1.2834417  | -0.00665    | 0.79134485 | 0.95094382 | 1.27014174 | -1.1238427  |  |  |  |
|            | GNR-NE      | -0.3003031 | 1.14115166 | 0.18018184 | 1.         |            |            |            |            |             |             |             |            |            |            |             |  |  |  |

| July       | August      | September  | October    | November   | December   | January    | February   | March      | April       | May         | June       | July       | August     | September  | October    | November   | December    | January    | February   | March      | April       |
|------------|-------------|------------|------------|------------|------------|------------|------------|------------|-------------|-------------|------------|------------|------------|------------|------------|------------|-------------|------------|------------|------------|-------------|
| -0.8464281 | -0.5603116  | 0.01192152 | -1.1325446 | -0.274195  | 3.15920342 | 0.5841546  | -0.8464281 | -1.4186612 | -0.274195   | -0.274195   | 0.01192152 | 0.87027113 | 1.4425042  | -0.8464281 | -0.8464281 | -0.5603116 | 0.5841546   | -0.274195  | 1.4425042  | 4.30366957 | 1.15638767  |
| -0.7273571 | 0.02078163  | 0.5195408  | 2.51457745 | 0.76892038 | 0.10829966 | 0.02078163 | 0.76892038 | -0.9767367 | -0.2285979  | -0.9767367  | -0.9767367 | -1.4754959 | -1.2261163 | 0.27016121 | -0.2285979 | 1.7664387  | 0.5195408   | 0.5195408  | -0.9767367 | -1.4754959 | -0.7273571  |
| 1.43714076 | 0.7473132   | -0.459885  | 3.16170967 | -0.459885  | 0.22994252 | 1.43714076 | -0.459885  | -0.8047988 | 0.05748563  | 0.05748563  | 0.6323419  | 0.05748563 | -0.6323419 | 0.7473132  | -0.2874282 | 0.22994252 | 1.43714076  | 2.29942522 | -1.3221695 | -1.6670833 | -0.9772557  |
| 0.29366215 | 0.29366215  | 1.23338102 | 0.76352158 | -0.1761973 | -0.1761973 | -0.1761973 | -0.1761973 | -0.2056355 | -0.1761973  | -0.1761973  | 1.23338102 | -0.1761973 | -0.1761973 | -0.1761973 | -0.6460567 | -0.1761973 | -0.1761973  | -0.1761973 | -0.1761973 | -0.1761973 | -1.5857756  |
| 0.55141097 | -0.9190183  | -0.1838037 | 0.55141097 | 1.28662559 | -0.9190183 | -0.9190183 | -0.1838037 | -0.1838037 | 0.55141097  | 3.49226945  | -0.1838037 | -0.9190183 | -0.9190183 | -0.1838037 | 1.28662559 | -0.1838037 | -0.1838037  | 2.75705483 | -0.1838037 | 0.55141097 | 0.55141097  |
| -0.8391464 | -0.0645497  | 1.48464362 | -0.8391464 | 3.03383695 | -0.0645497 | -0.8391464 | -0.0645497 | 0.71004695 | -0.8391464  | 0.71004695  | -0.0645497 | 2.25924029 | 0.71004695 | 0.71004695 | -0.8391464 | -0.8391464 | -0.0645497  | -0.8391464 | -0.0645497 | -0.8391464 | 0.71004695  |
| -0.4211243 | 0.35633595  | -0.4211243 | 1.1337962  | 0.35633595 | 1.1337962  | 2.68871671 | -1.1985846 | -1.1985846 | -1.1985846  | -0.4211243  | -0.4211243 | -1.1985846 | 1.1337962  | -0.4211243 | 0.35633595 | 1.91125645 | -0.4211243  | 0.35633595 | 1.1337962  | -0.4211243 | -1.1985846  |
| 0.70728153 | 1.76820382  | -1.0609223 | 0          | 0          | 1.76820382 | 1.76820382 | 0.70728153 | -1.0609223 | -0.70728153 | -0.35364076 | 0.35364076 | 1.41456305 | -1.4145631 | 0.35364076 | -1.7682038 | 0.35364076 | -0.70728153 | -1.0609223 | -1.0609223 | -0.3536408 | -0.70728153 |
| 1.06041944 | 1.06041944  | 1.06041944 | -0.0964018 | -1.253223  | -1.253223  | -1.253223  | -0.0964018 | -1.253223  | 2.21724064  | -1.253223   | 2.21724064 | -1.253223  | -0.0964018 | -1.253223  | -0.0964018 | -1.253223  | -0.0964018  | -1.253223  | -0.0964018 | -0.0964018 | 1.06041944  |
| 1.5446187  | -0.6248922  | 0.64607499 | 0.39188155 | -0.3706988 | -1.1332791 | -0.3706988 | -1.1332791 | 0.64607499 | 0.13768811  | 0.90026684  | -0.1165503 | -1.1332791 | 0.13768811 | 0.13768811 | -1.8958594 | 0.39188155 | 0.39188155  | 1.5446187  | 1.5446187  | 3.44220281 | 8.27187814  |
| -1.7563995 | -1.1454779  | -1.1454779 | 0.07636519 | 1.60366909 | 0.07636519 | 0.38182597 | -0.8400171 | -0.2290956 | 0.68728675  | -0.5345564  | -0.8400171 | 2.52005143 | -0.8400171 | -1.1454779 | 0.38182597 | -0.2290956 | 0.99274753  | -0.8400171 | 0.99274753 | -1.1454779 | -0.2290956  |
| -0.1339708 | 0.8117055   | -0.3231061 | 0.05516445 | 0.43343497 | 0.62257023 | -1.6470529 | -0.3231061 | -0.7013766 | 0.05516445  | 0.62257023  | -1.6470529 | 0.05516445 | 1.18997602 | 1.56824654 | 0.43343497 | 1.18997602 | 1.18997602  | 1.37911128 | -1.6470529 | -1.2687824 | -0.8905119  |
| 0.71973469 | -1.4394694  | -1.0076286 | 1.1515755  | 1.1515755  | 2.44709793 | -0.5757877 | -1.4394694 | -1.0076286 | -0.5757877  | -0.1439469  | -1.0076286 | 0.71973469 | 0.28789387 | -0.1439469 | -0.5757877 | 1.1515755  | 1.1515755   | -0.1439469 | 2.44709793 | -0.1439469 | 0.28789387  |
| 0.4658475  | 0.4658475   | 1.02486449 | -0.931695  | -1.2112035 | -0.6521865 | 0.4658475  | -0.931695  | 3.26093247 | -0.931695   | 1.02486449  | -0.6521865 | 1.02486449 | -0.6521865 | 1.02486449 | -0.6521865 | 0.4658475  | 1.58388148  | -0.931695  | 0.4658475  | 1.02486449 | -0.6521865  |
| -0.4341567 | -1.3024702  | -1.3024702 | 3.90741054 | 0.43415673 | -0.4341567 | 1.30247018 | -0.4341567 | 0.43415673 | -1.3024702  | -0.4341567  | 0.43415673 | 0.43415673 | 0.43415673 | 0.43415673 | 0.43415673 | 0.43415673 | 0.43415673  | 0.43415673 | -1.3024702 | -0.4341567 | -0.4341567  |
| -0.0508243 | -1.2706073  | -0.6607158 | -0.0508243 | -1.2706073 | -0.6607158 | -0.0508243 | -1.2706073 | 1.16895673 | 0.55906722  | -0.6607158  | -0.0508243 | 1.77885024 | -0.6607158 | 0.55906722 | -1.2706073 | 0.55906722 | 0.55906722  | -1.2706073 | -1.2706073 | -1.2706073 | -1.2706073  |
| -0.8294394 | -0.8294394  | -0.2914247 | 0.2465901  | 0.2465901  | 0.2465901  | 1.59162701 | -0.560432  | -0.2914247 | 0.2465901   | 1.86063439  | 2.66765653 | -1.0984468 | 0.78460486 | -0.8294394 | -1.0984468 | -0.2914247 | -0.2914247  | -0.2914247 | -0.2914247 | -0.8294394 | -0.8294394  |
| -0.9849495 | 2.06521676  | 2.06521676 | 0.54013361 | 0.54013361 | -0.222408  | -0.222408  | -0.9849495 | -0.222408  | -0.222408   | 1.30267518  | 2.06521676 | -0.9849495 | -0.9849495 | -0.222408  | -0.9849495 | -0.9849495 | -0.9849495  | -0.9849495 | -0.9849495 | -0.9849495 | 0.54013361  |
| -0.75892   | -0.2013461  | 1.09965956 | 0.91380161 | -0.2013461 | -0.9447779 | 0.72794365 | 0.72794365 | 0.5420857  | -0.573062   | -0.75892    | -0.573062  | -0.0154882 | 0.17036979 | 0.5420857  | 1.09965956 | -0.75892   | 0.35622774  | -0.573062  | 0.72794365 | -0.0154882 | 0.17036979  |
| -1.5925676 | 0.49224816  | 0.49224816 | -0.6658928 | 0.26060197 | 0.02895577 | -0.4343366 | -1.5925676 | -0.897629  | -1.18718674 | 0.49224816  | -0.2026904 | -0.897629  | 1.18718674 | -0.4343366 | -1.3609214 | -1.3609214 | 1.88212533  | 0.02895577 | -1.1292752 | -0.4343366 | -1.3609214  |
| 0.44289347 | -1.1924055  | 0.71544329 | 0.98799312 | 1.26054294 | -1.022062  | -1.022062  | -1.1924055 | -0.9198557 | -0.374756   | 0.17034364  | 1.26054294 | -0.9198557 | 1.18718674 | -0.4343366 | -1.3609214 | 1.88212533 | 0.02895577  | -1.1292752 | -0.4343366 | -1.3609214 | -1.3609214  |
| -1.1148838 | 1.033054039 | -0.7242676 | 0.64289918 | -0.3366513 | -1.1148838 | -0.3366513 | 1.81473781 | -0.7242676 | 1.61942971  | 0.1366513   | -0.3366513 | 0.25227297 | -0.7242676 | -0.3366513 | -0.5289595 | 1.2288135  | 1.4241216   | -1.1148838 | -1.383432  | -0.7242676 | -1.383432   |
| -0.6332785 | 1.36654896  | -0.2333131 | 0.16665224 | 0.6332785  | -0.2333131 | 0.16665224 | 2.96640985 | -0.6332785 | -0.6332785  | -0.6332785  | -0.6332785 | -0.6332785 | -0.6332785 | -0.6332785 | -0.6332785 | -0.2333131 | -0.2333131  | -0.2333131 | -0.2333131 | -0.6332785 | -0.6332785  |
| 0.13010412 | 0.13010412  | 0.13010412 | 2.21177012 | 3.25260312 | -0.9107289 | -0.9107289 | 0.13010412 | -0.9107289 | -0.9107289  | -0.9107289  | -0.9107289 | 0.13010412 | -0.9107289 | -0.9107289 | -0.9107289 | 0.13010412 | 0.13010412  | 1.7093712  | 0.13010412 | -0.9107289 | -0.9107289  |
| -0.6817409 | 3.19341771  | 1.47112501 | 1.90169819 | -0.6817409 | -0.2511677 | -0.2511677 | 0.17940549 | 0.17940549 | -0.6817409  | -0.2511677  | -1.112314  | -1.112314  | 0.17940549 | -0.6817409 | -0.6817409 | -0.2511677 | -0.6817409  | -0.2511677 | -0.6817409 | -0.2511677 | -0.2511677  |
| -0.2422002 | -0.4949308  | -1.000392  | -1.5058532 | 1.77964469 | 1.02145287 | -1.000392  | -0.7476614 | -1.7585838 | -0.2422002  | 0.76872226  | 1.02145287 | -0.2422002 | 0.01055044 | -0.7476614 | -0.2422002 | 0.01055044 | 0.76872226  | 1.02145287 | -1.000392  | -0.4949308 | -0.2422002  |
| 1.21627488 | -0.4236463  | -0.4236463 | -0.4236463 | -0.4236463 | -0.4236463 | -0.4236463 | -0.4236463 | -0.5876384 | -0.2956452  | -0.5876384  | -0.2956452 | -0.5876384 | 1.380267   | 0.72429853 | -0.5876384 | 0.06833005 | 1.21627488  | -0.0956621 | -0.5876384 | 0.2323217  | 0.5603641   |
| -2.0256121 | -0.1794846  | -0.1794846 | 1.05126703 | 0.43589121 | -0.3846099 | -0.3846099 | 0.64101648 | -0.7948604 | 0.02564066  | -0.9998957  | -1.6607158 | 0.02564066 | 1.2563923  | 0.43589121 | 0.64101648 | 1.46151757 | -0.1794846  | -0.5897352 | 0.02564066 | 4.74352195 | 9.46140323  |
| 0.66487243 | -0.1899636  | -0.7598542 | 0.3799271  | 0.66487243 | -1.8996355 | 0.09498178 | -0.7598542 | -1.0447995 | 0.09498178  | 0.66487243  | -0.1899636 | -1.0447995 | -0.1899636 | -0.4749089 | -0.4749089 | -0.4749089 | 0.09498178  | -0.4749089 | -0.4749089 | -0.1899636 | -0.1899636  |
| -0.4698092 | -0.8725029  | 1.14096529 | -1.2751965 | 0.53692484 | -0.8725029 | -0.6711561 | -0.0671156 | -0.2684624 | 0.73827166  | 0.13423121  | 0.53692484 | 0.53692484 | 0.33557803 | -0.8725029 | 0.13423121 | 3.15443346 | -0.0671156  | -0.8725029 | -0.8725029 | -0.2684624 | -0.2684624  |
| -0.478513  | -0.1305035  | 3.00158153 | -0.478513  | -1.1745319 | -0.478513  | -1.5225414 | -1.1745319 | -0.478513  | 0.21750591  | -0.478513   | -0.1305035 | -0.1305035 | 1.60954372 | -0.1305035 | 0.56551536 | 0.21750591 | 1.60954372  | -1.1745319 | -0.8265225 | -0.1305035 | 0.56551536  |
| -1.1652603 | 0.26890622  | 1.70307272 | 0.98598947 | -0.448177  | 0.98598947 | -1.1652603 | -0.448177  | -0.448177  | -1.1652603  | -0.448177   | -0.448177  | -0.448177  | -0.448177  | -0.448177  | 3.13723923 | -0.448177  | -0.448177   | -0.448177  | -0.448177  | 0.26890622 | 1.70307272  |
| 2.73861279 | 0           | 0          | -1.3693064 | 1.36930639 | -1.3693064 | -1.3693064 | 0          | -1.3693064 | 0           | -1.3693064  | 0          | -1.3693064 | 0          | 0          | 0          | 0          | 2.73861279  | 0          | 0          | 0          | 1.36930639  |
| -0.5125568 | -1.6841152  | -1.6841152 | 1.83055996 | -1.098336  | -1.098336  | 0.732224   | 1.24478077 | -0.5125568 | 0.732224    | 2.41633914  | 0.65900158 | 1.24478077 | 1.24478077 | -0.5125568 | 0.732224   | 1.24478077 | 0.65900158  | 1.83055996 | -1.098336  | 0.65900158 | -1.6841152  |
| -0.4006236 | -1.1402363  | -1.1402363 | -0.0308172 | 1.07860193 | -0.77043   | -0.77043   | 0.33898918 | 1.07860193 | -1.879491   | -0.4006236  | 0.33898918 | -1.1402363 | 0.33898918 | -1.1402363 | 0.33898918 | 2.1880217  | -0.0308172  | -1.1402363 | -1.5100427 | 1.44840831 | -0.0308172  |
| -0.6236096 | 0.31180478  | -0.6236096 | -0.6236096 | 0.31180478 | -0.6236096 | -0.6236096 | 1.24721913 | -0.6236096 | 0.31180478  | -0.6236096  | -0.6236096 | -0.6236096 | -0.6236096 | 3.11804782 | -0.6236096 | -0.6236096 | -0.6236096  | -0.6236096 | -0.6236096 | -0.6236096 | -0.6236096  |
| 0.14957194 | 0.14957194  | 0.91879904 | -0.6196552 | -0.3632461 | 0.91879904 | -1.1324732 | 1.68802615 | -0.3632461 | 0.40598097  | -1.3888823  | 0.14957194 | -1.3888823 | -1.9017003 | 0.14957194 | 0.91879904 | 1.68802615 | -1.068371   | 2.45725325 | 1.68802615 | 5.0213436  | 4.50852553  |
| 1.70780423 | 0.30412952  | 0.02339458 | -0.8188102 | 0.8655994  | 1.14633434 | 1.42706929 | -0.5380753 | -1.3802801 | -0.8188102  | -0.2573404  | -0.8188102 | -0.2573404 | -1.0995452 | 0.8655994  | 1.98853917 | -0.8188102 | 1.42706929  | 0.8655994  | 0.58486446 | -0.8188102 | 0.02339458  |
| -0.3258479 | -0.1662489  | 1.4297407  | 1.05299401 | 1.74893863 | -0.80464   |            |            |            |             |             |            |            |            |            |            |            |             |            |            |            |             |
